# Supplementary material
Source: publisher figshare collection journal article supplement (https://tandf.figshare.com/ndownloader/files/22754729)
Supplement: Supplementary file 1 [file 22754729]

| Maternal age |
| --- |
| Maternal weight and Height |
| Racial origin (Caucasian, Afro-Caribbean, South Asian, East Asian and mixed) |
| Past obstetric history: nulliparous, parous without prior PE, parous with prior PE |
| Interpregnancy interval in years between the birth of the last child |
| Gestational age at delivery (weeks) and birthweight of previous pregnancy beyond 24 weeks |
| Method of conception: Spontaneous, ovulation induction, in vitro fertilization |
| Cigarette smoking during pregnancy |
| History of Chronic hypertension |
| History of type 1 or 2 diabetes mellitus, insulin intake |
| History of Systemic lupus erythematosus or Anti-phospholipid syndrome |
| History of PE in the mother |

**Table 2 Maternal characteristics, demographic factors and history to be documented in the first trimester pre-eclampsia (PE) screening protocol [14]**

*** Parity is defined as previous pregnancies(s) which crossed 24 weeks of gestation**
